# Supplementary material for: Nitrogen-doped 3D hollow carbon spheres for efficient selective oxidation of C–H bonds under mild conditions
Source: Royal Society of Chemistry journal article supplement (doi:10.1039/d2nj01495e), 2022-01-01
Supplement: d2nj01495e1.pdf [file d2nj01495e1.pdf]

## Supporting Information

# Nitrogen-Doped Hollow Sphere Carbon-Based Catalyst for Efficient Selective Oxidation of C–H bonds under Mild-Conditions

*Huan Zhang,<sup>a</sup> An Cai,<sup>a</sup> Hongwei He,<sup>a</sup> Qicheng Zhang,<sup>a</sup> Fengbao Zhang,<sup>a</sup> Guoliang Zhang,<sup>a</sup> Xiaobin Fan,<sup>a</sup>*

*Wenchao Peng,<sup>a</sup> and Yang Li<sup>a,b,c,\*</sup>*

<sup>a</sup>School of Chemical Engineering and Technology, State Key Laboratory of Chemical Engineering, Tianjin University, Tianjin, 300072, China

<sup>b</sup>Haihe Laboratory of Sustainable Chemical Transformations, Tianjin 300192, China

<sup>c</sup>Institute of Shaoxing, Tianjin University, Zhejiang 312300, China

\*Email: [liyang1895@tju.edu.cn](mailto:liyang1895@tju.edu.cn)

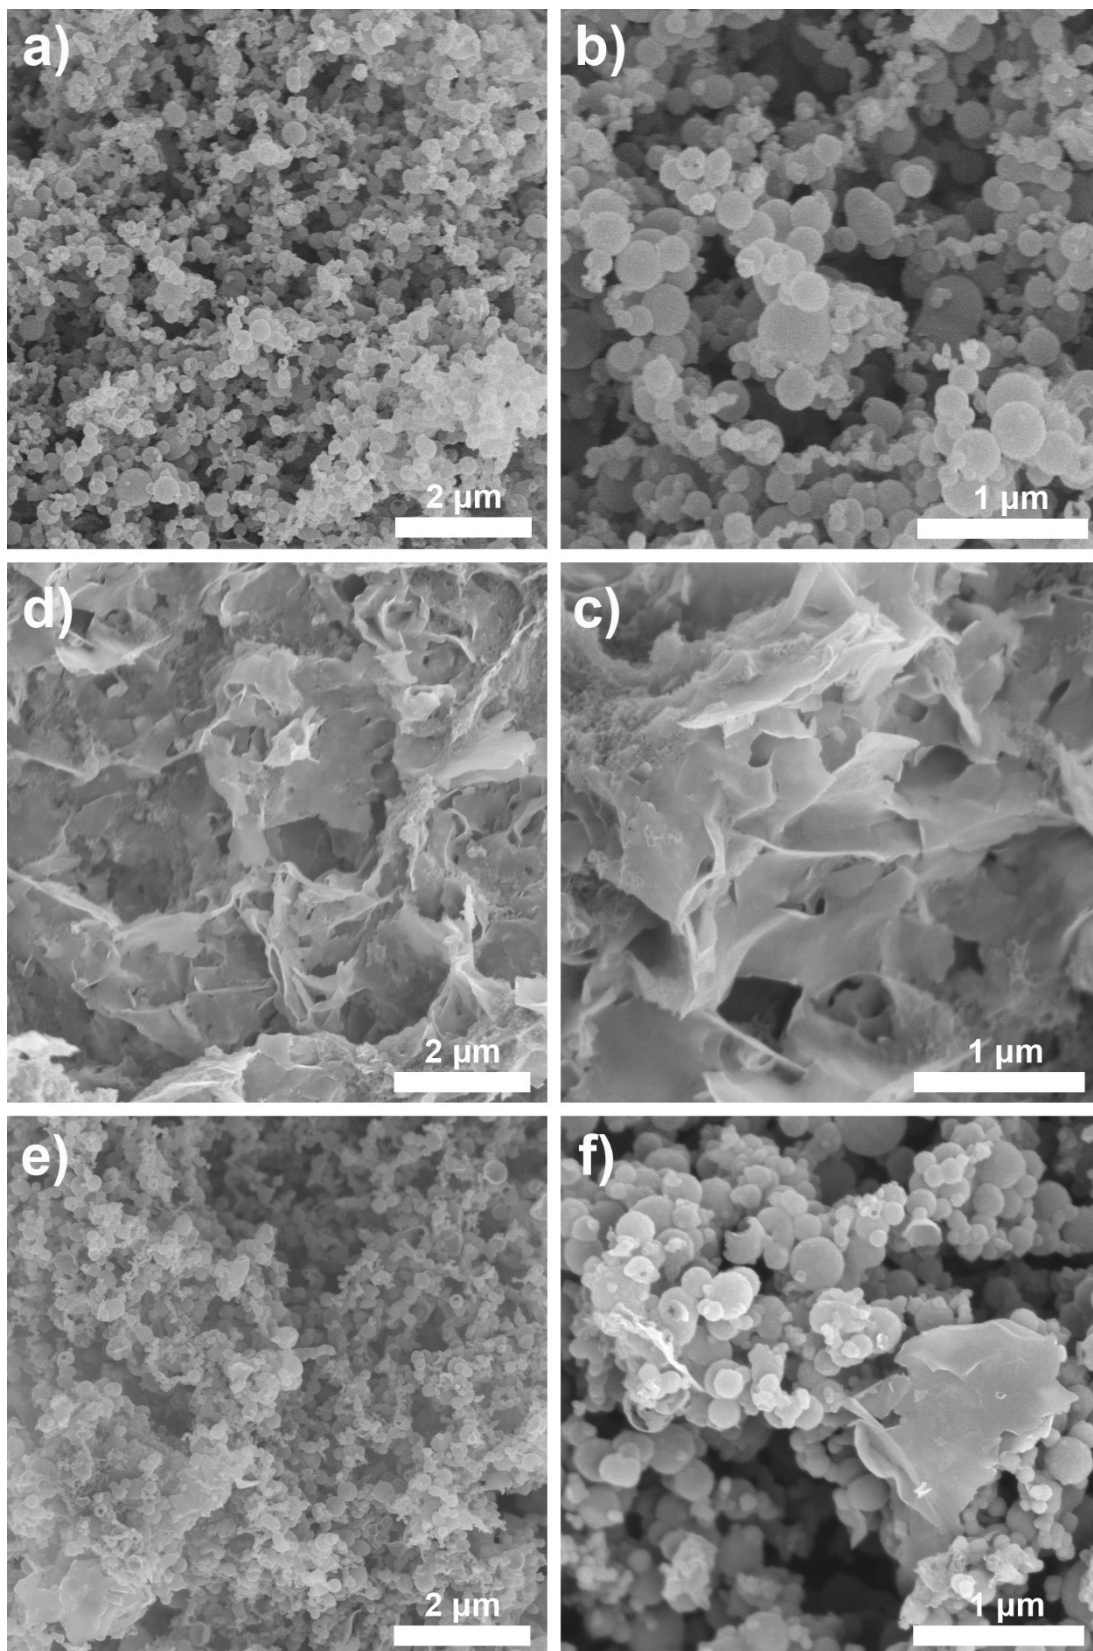

**Figure S1.** SEM images of (a) and (b) N-HCS-900;(c) and (d) N-HCS-800, (e) and (f) N-HCS-1000, respectively.

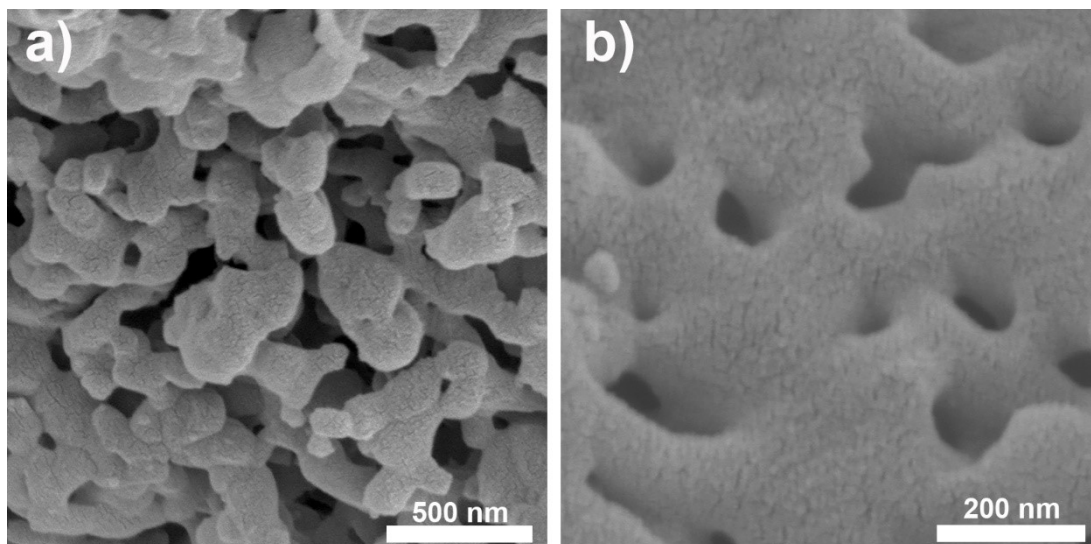

Figure S2. SEM images of (a) and (b) N-HPC.

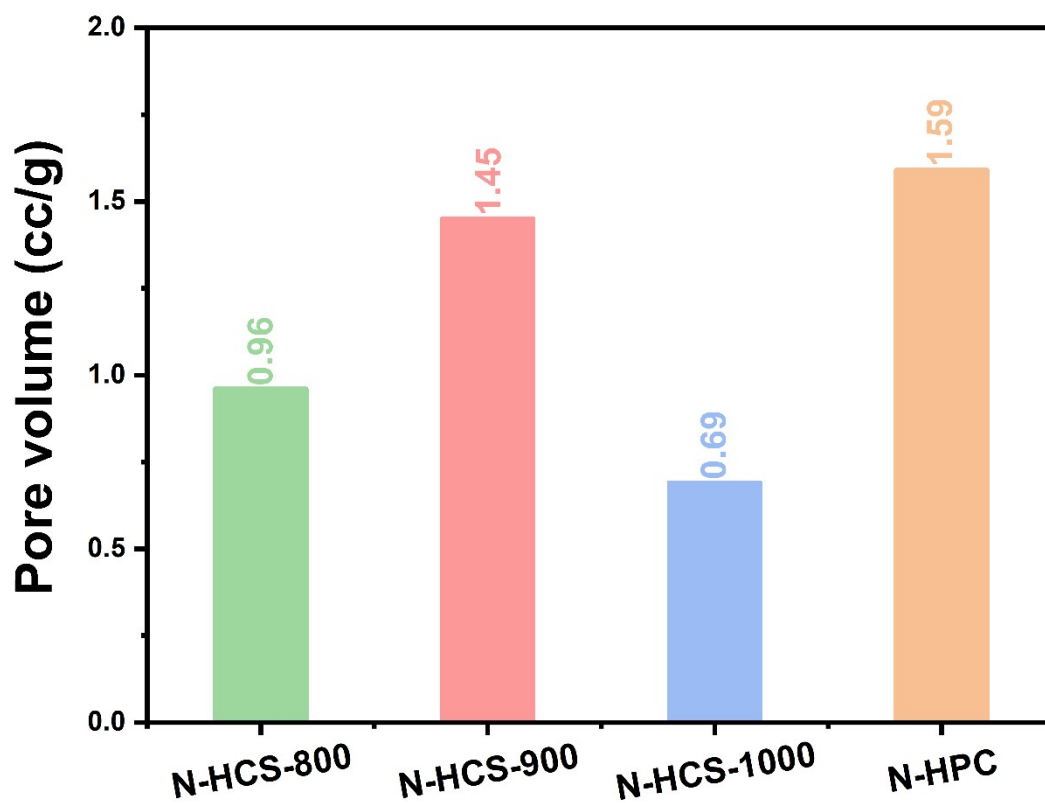

Figure S3. The total pore volume of N-HCS-800, N-HCS-900, N-HCS-1000, and N-HPC, respectively.

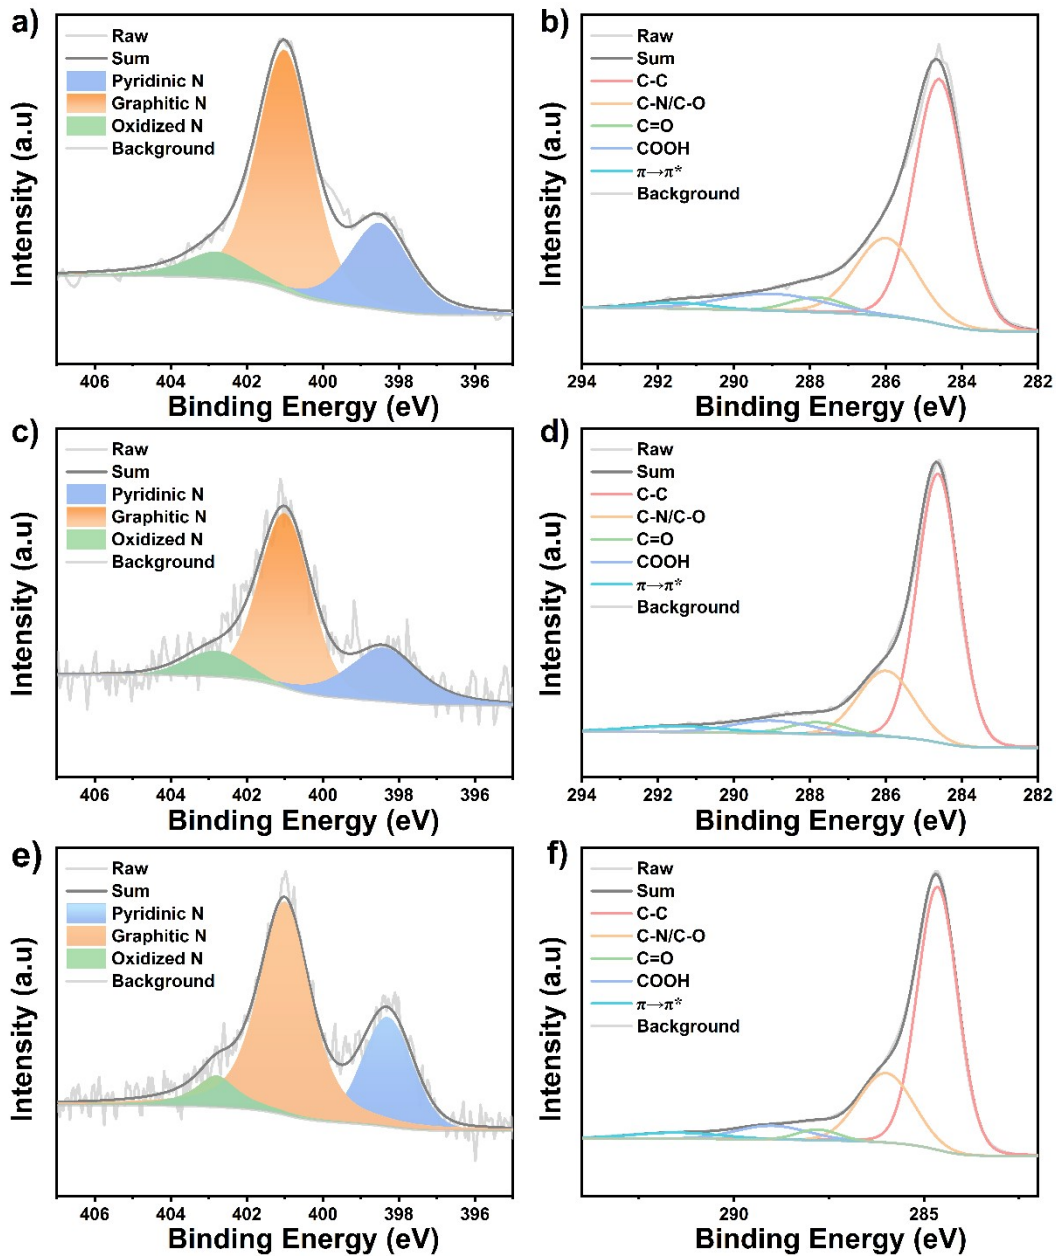

**Figure S4.** X-ray photoelectron spectroscopy N 1s spectra of (a) N-HCS-800, (c) N-HCS-1000 and (e) N-HPC, respectively. X-ray photoelectron spectroscopy C 1s spectra of (b) N-HCS-800, (d) N-HCS-1000 and (f) N-HPC, respectively.

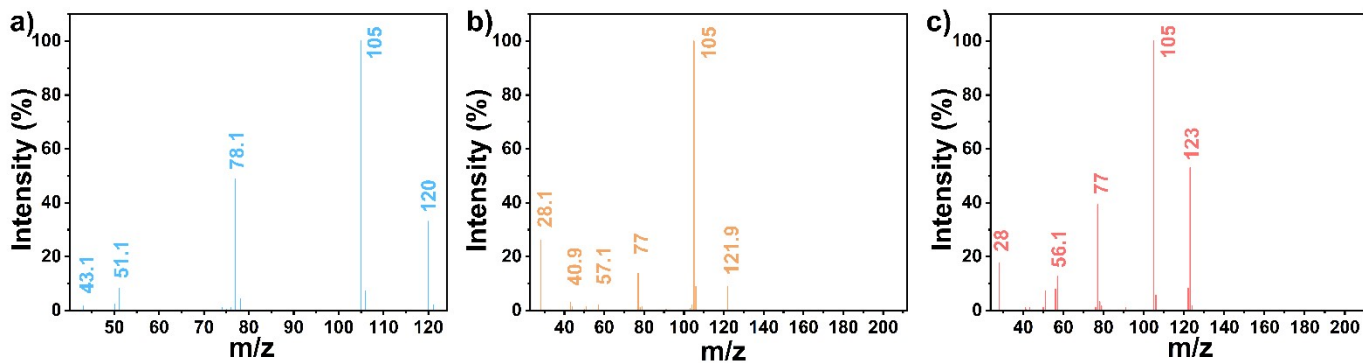

**Figure S5.** GC-MS spectrum of one product after the reaction catalyzed by N-HCS-900 with retention time in 6.836-6.911 min (a). This is matched with GC-MS spectrum of acetophenone.

GC-MS spectrum of one product after the reaction catalyzed by N-HCS-900 with retention time in 8.685-8.718 min (b). This is matched with GC-MS spectrum of phenyl benzoate.

GC-MS spectrum of one product after the reaction catalyzed by N-HCS-900 with retention time in 8.844-8.891 min (c). This is matched with GC-MS spectrum of 2-methylpropyl benzoate.

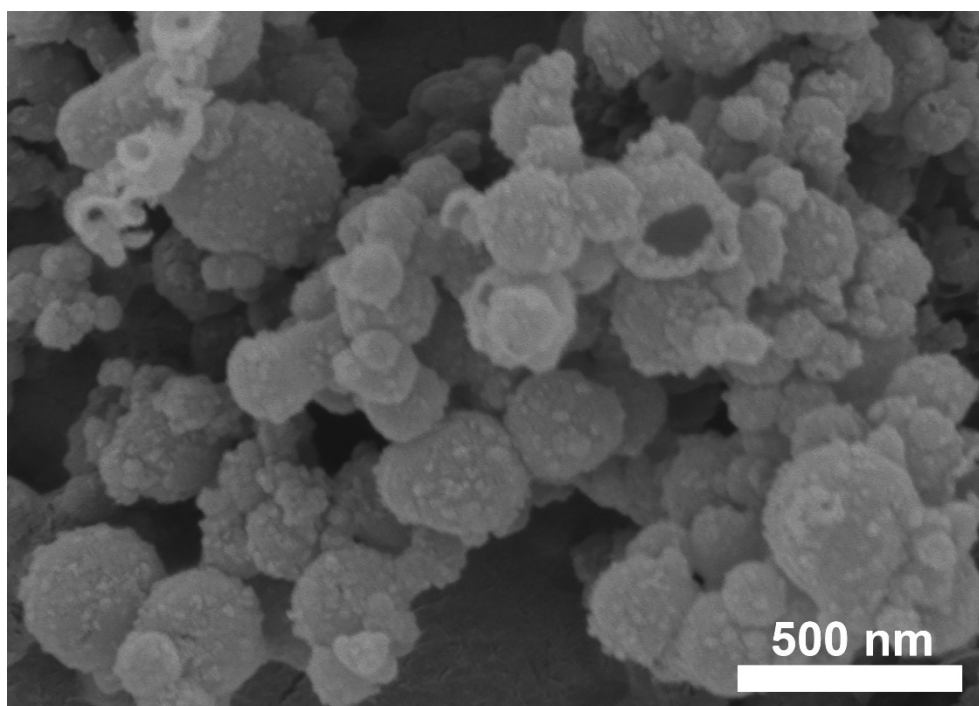

**Figure S6.** SEM image of the HCS.

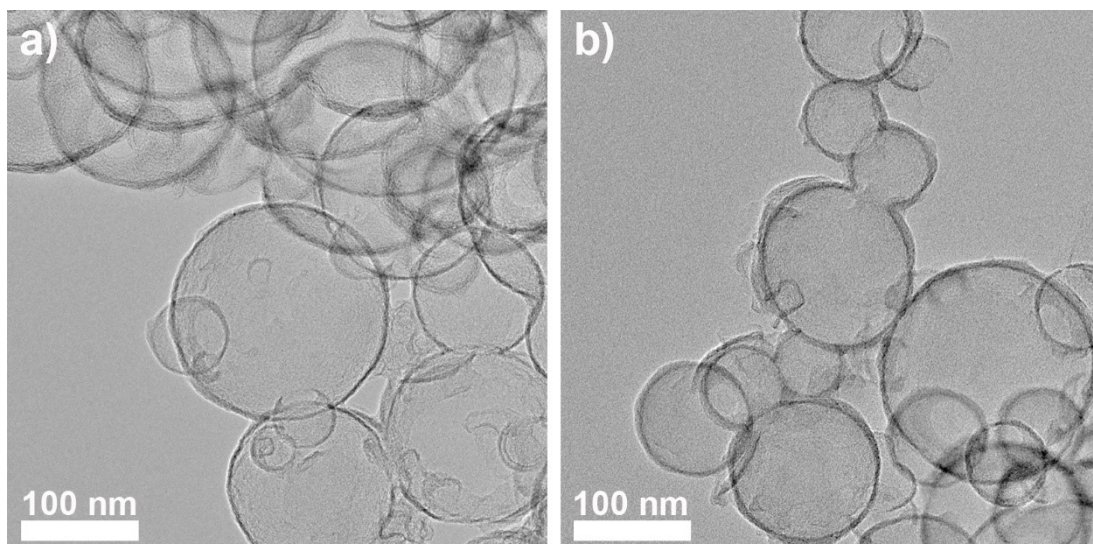

**Figure S7.** TEM images of the N-HCS-900 after 5 cycles reaction.

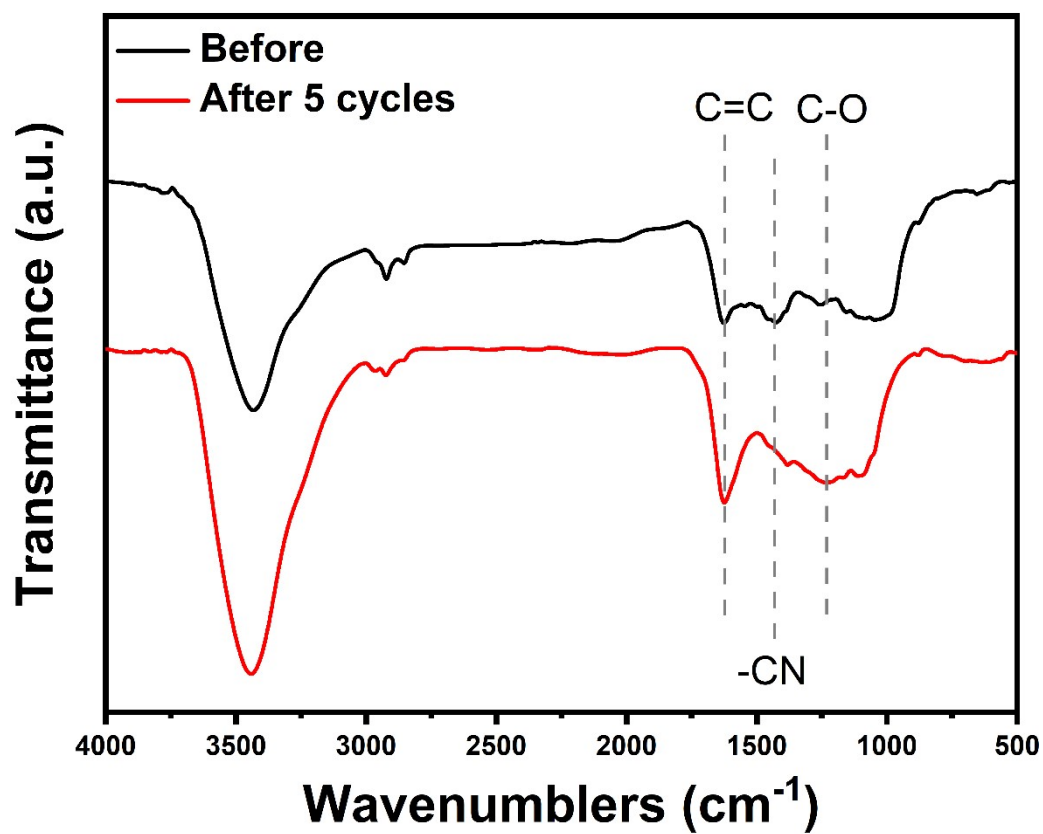

**Figure S8.** FTIR spectra of N-HCS-900 before and after 5 cycles reaction, respectively.

**Table S1.** Quantitative XPS measurements of chemically doped carbon materials.

| Sample     | C at. % | O at. % | N at. %     |             |            |
|------------|---------|---------|-------------|-------------|------------|
|            |         |         | Pyridinic N | Graphitic N | Oxidized N |
| N-HCS-800  | 87.3    | 5.3     | 2.0         | 4.7         | 0.7        |
| N-HCS-900  | 88.2    | 5.6     | 1.0         | 4.0         | 1.2        |
| N-HCS-1000 | 91      | 3.4     | 1.6         | 3.4         | 0.6        |
| N-HPC      | 88      | 5.3     | 1.8         | 4.2         | 0.7        |

**Table S2.** The atomic percentages of surface functional groups from deconvoluted C 1s XPS spectral fitting.

| Sample     | C–C      | C–N/C–O  | C=O      | COOH     | $\pi \rightarrow \pi^*$ |
|------------|----------|----------|----------|----------|-------------------------|
|            | 284.6 eV | 286.0 eV | 287.8 eV | 289.0 eV | 291.5 eV                |
| N-HCS-800  | 53.23%   | 21.40%   | 3.47%    | 7.44%    | 1.76%                   |
| N-HCS-900  | 54.06%   | 19.40%   | 4.49%    | 6.21%    | 4.04%                   |
| N-HCS-1000 | 60.04%   | 19.05%   | 3.47%    | 5.35%    | 3.09%                   |
| N-HPC      | 54.00%   | 20.85%   | 5.21%    | 5.02%    | 2.92%                   |

**Table S3.** Catalytic activity of N-HCS/N-HPC catalysts for the selective oxidation reaction of ethylbenzene in water<sup>a</sup>.

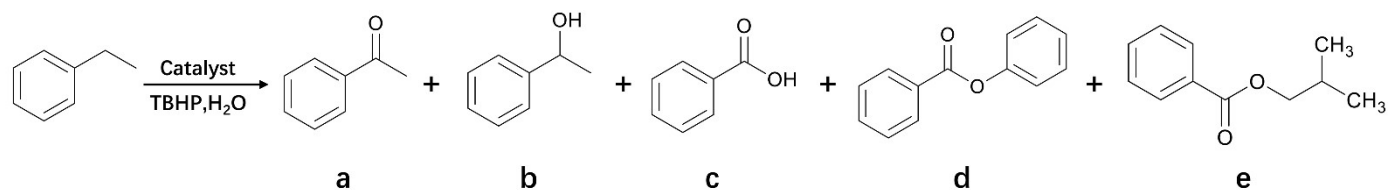

| Entry | Catalyst    | Temperature (°C) | Conversion (%) | Selectivity (%) |       |       |       |       |
|-------|-------------|------------------|----------------|-----------------|-------|-------|-------|-------|
|       |             |                  |                | a               | b     | c     | e     | f     |
| 1     | AC          | 50               | 17.65          | 62.39           | 10.88 | 1.64  | 24.76 | trace |
| 2     | HCS         | 50               | 6.05           | 62.39           | 4.28  | 26.80 | 6.53  | trace |
| 3     | N-HCS -800  | 50               | 86.01          | 93.63           | 0.10  | 0.66  | 5.41  | 0.20  |
| 4     | N-HCS -900  | 30               | 46.19          | 93.00           | 0.51  | trace | 6.49  | trace |
| 5     | N-HCS -900  | 40               | 78.32          | 96.41           | trace | trace | 3.59  | trace |
| 6     | N-HCS -900  | 50               | 98.38          | 99.33           | trace | trace | 0.54  | 0.13  |
| 7     | N-HCS -900  | 80               | 99.45          | 99.25           | trace | trace | 0.33  | 0.42  |
| 8     | N-HCS -1000 | 50               | 87.75          | 97.98           | 0.20  | 0.17  | 1.65  | trace |
| 9     | N-HPC       | 50               | 94.72          | 98.09           | trace | trace | 1.32  | 0.59  |

<sup>a</sup>Reaction conditions: 10.0 mg of catalyst, 0.5mmol of substrate, 500  $\mu$ L of TBHP as a 70 wt% aqueous solution diluted with 6.5 mL of water for 12h. The conversion and selectivity were determined by GC analysis system equipped with HP-5 capillary and an FID.



**Table S4.** Comparison table of the catalytic performance of N-HCS-900 catalysts with those reported in literatures.

| Entry | Catalyst                                              | Reaction conditions                                                                   | Conv. (%) | Sel. (%) | TOF <sup>a</sup><br>mole <sub>cat</sub> <sup>-1</sup> g <sup>-1</sup> h <sup>-1</sup> | Ref.              |
|-------|-------------------------------------------------------|---------------------------------------------------------------------------------------|-----------|----------|---------------------------------------------------------------------------------------|-------------------|
| 1     | N-HCS-900                                             | 50°C, H <sub>2</sub> O solvent, 500 μL TBHP, 0.5 mmol substrate, 10 mg catalysts, 12h | 98        | 99       | 4.10×10 <sup>-3</sup>                                                                 | This work         |
| 2     | N-HCS-900                                             | 80°C, H <sub>2</sub> O solvent, 500 μL TBHP, 0.5 mmol substrate, 10 mg catalysts, 12h | 99        | 99       | 4.14×10 <sup>-3</sup>                                                                 | This work         |
| 3     | LC-N-8.9<br>(N-doped layer carbon with 8.9% nitrogen) | 80°C, H <sub>2</sub> O solvent, 3 mmol TBHP, 0.5 mmol substrate, 10 mg catalysts, 24h | 98        | 91       | 4.08×10 <sup>-3</sup>                                                                 | Ref. <sup>1</sup> |
| 4     | NGG-4-900<br>(N-doped graphene gel)                   | 80°C, H <sub>2</sub> O solvent, 500 μL TBHP, 0.5 mmol substrate, 10 mg catalysts, 12h | 99        | 99       | 4.13×10 <sup>-3</sup>                                                                 | Ref. <sup>2</sup> |
| 5     | NMC<br>(N-doped mesoporous carbon)                    | 80°C, H <sub>2</sub> O solvent, 3 mmol TBHP, 1 mmol substrate, 10 mg catalysts, 24h   | 88        | 60       | 3.67×10 <sup>-3</sup>                                                                 | Ref. <sup>3</sup> |
| 6     | NOMC-800<br>(N-doped mesoporous carbon)               | 80°C, H <sub>2</sub> O solvent, 3 mmol TBHP, 1 mmol substrate, 50 mg catalysts, 12h   | 63        | 84       | 1.06×10 <sup>-3</sup>                                                                 | Ref. <sup>4</sup> |

|   |                                                           |                                                                                            |    |    |                       |                   |
|---|-----------------------------------------------------------|--------------------------------------------------------------------------------------------|----|----|-----------------------|-------------------|
| 7 | 3/3-DIRA-900 (3D N-doped meso/microporous carbon beads)   | 100°C, TBHP in 3 mL substrate, 100 mg catalysts, 12h                                       | 83 | 93 | $1.71 \times 10^{-2}$ | Ref. <sup>5</sup> |
| 8 | PDNSC-800 (Polymer-derived N,S co-doped carbon catalysts) | 80°C, H <sub>2</sub> O solvent, 500 $\mu$ L TBHP, 1.0 mmol substrate, 20 mg catalysts, 10h | 99 | 99 | $4.95 \times 10^{-3}$ | Ref. <sup>6</sup> |
| 9 | NPS-HCS (N,P,S co-doped hollow carbon shells)             | 80°C, H <sub>2</sub> O solvent, 500 $\mu$ L TBHP, 1.0 mmol substrate, 10 mg catalysts, 12h | 99 | 99 | $8.25 \times 10^{-3}$ | Ref. <sup>7</sup> |

<sup>a</sup> Turnover frequency (TOF): 
$$\text{TOF} = \frac{\text{amount of the converted substrate (mol)}}{\text{mass of catalyst (g)} \times \text{reaction time (h)}}$$

## References

1. Y. Gao, G. Hu, J. Zhong, Z. Shi, Y. Zhu, D. S. Su, J. Wang, X. Bao and D. Ma, *Angew. Chem. Int. Ed.*, 2013, **52**, 2109-2113.
2. A. Cai, H. He, Q. Zhang, Y. Xu, X. Li, F. Zhang, X. Fan, W. Peng and Y. Li, *ACS Appl. Mater. Interfaces*, 2021, **13**, 13087-13096.
3. A. Chen, Y. Yu, R. Wang, Y. Yu, W. Zang, P. Tang and D. Ma, *Nanoscale*, 2015, **7**, 14684-14690.
4. J. Wang, H. Liu, X. Gu, H. Wang and D. S. Su, *Chem. Commun.*, 2014, **50**, 9182-9184.
5. Z. Wang, Y. Jiang, H. Huo, Y. Hu, X. Xu, P. Wang, Y. Yang and K. Lin, *Carbon*, 2020, **158**, 226-237.
6. X. Hu, X. Sun, Q. Song, Y. Zhu, Y. Long and Z. Dong, *Green Chem.*, 2020, **22**, 742-752.
7. S. Yang, L. Peng, P. Huang, X. Wang, Y. Sun, C. Cao and W. Song, *Angew. Chem. Int. Ed.*, 2016, **55**, 4016-4020.
